# Supplementary material
Source: publisher figshare collection journal article supplement (https://gsapubs.figshare.com/ndownloader/files/22758647)
Supplement: Supplementary file 1 [file 22758647]

**2 Appendix : GPS data analysis and data interpretation**

**3 GPS data analysis and transient deformation**

4           Velocities of GPS sites throughout Japan are derived from combination of SINEX  
5 (Solution INdependent EXchange format) files provided to us by the Geographical  
6 Survey Institute (GSI; <http://mekira.gsi.go.jp/>) from their daily processing of the  
7 continuous GPS Earth Observation Network (GEONET) network in Japan (~1200 CGPS  
8 sites in total) (Miyazaki et al., 1998; Sagiya et al, 2000). The daily network processing of  
9 the GEONET network is conducted by GSI (Sagiya et al., 2000), with Bernese GPS  
10 processing software (Rothacher and Mervart, 1996; Beutler et al., 2001) using standard  
11 processing methods. The SINEX files we use are from one day every three months for the  
12 period 1996-2004. In order to combine the daily SINEX files to estimate velocities for  
13 the CGPS sites in Japan relative to a known terrestrial reference frame, we use GLOBK  
14 software (e.g., Herring, 2001). To help place the Japanese dataset in a global context, we  
15 also use daily solutions from Scripps Institute of Oceanography processing of the global  
16 IGS network of GPS sites (<http://sopac.ucsd.edu>), as well as SINEX files from processing  
17 of a subset of ~10 Japanese sites and several global sites that have been submitted by GSI  
18 to the Crustal Dynamics Data Information System (CDDIS; <http://cddis.gsfc.nasa.gov/>).  
19 Using GLOBK we estimate a rotation and translation of each dataset into the ITRF2000  
20 reference frame (Altamimi et al., 2002), for each day. To accomplish this, we tightly  
21 constrain the coordinates of a subset of the most reliable IGS GPS stations to their known  
22 ITRF2000 values. We do this for each set of daily solutions to obtain a time series of site  
23 positions in the ITRF2000 reference frame. The ITRF2000 velocities at each GPS station  
24 are calculated by a linear fit to the daily ITRF2000 coordinates. The uncertainties in the  
25 linear fits are derived using a white-noise model, so the uncertainties are seriously

underestimated (e.g., Zhang et al., 1997; Williams et al., 2004). We multiply the formal uncertainties by 5 to give “reasonable” values of about 1 mm/yr uncertainty in horizontal velocities for long-running stations within Japan (T. Nishimura, pers. comm., 2005). Ideally, the GPS velocity errors should be assessed more rigorously. This will require maximum-likelihood analysis of (probably daily, perhaps weekly) time series of GPS positions, to define the appropriate noise model for the data and to calculate a realistic velocity uncertainty (e.g., Williams et al., 2004; Langbein, 2004).

It is very important to avoid the effects on our velocity estimates from earthquakes and slow slip events. The major events influencing the GPS time series in Kyushu from 1996-early 2004 are coseismic and postseismic displacements from two large thrust earthquakes ( $M_s = 6.7$ ) near Hyuga-nada in 1996 (Yagi et al., 2001), the 1996-1997 Bungo Channel slow slip event (Hirose et al., 1999), and the 1997 Kagoshima-ken-hokuseibu earthquake (Fujiwara et al., 1998). To remove the influence of these transient displacements from the time series, we removed the time series data prior to 1998 in the regions affected by these events. Moreover, to avoid influence from the 2003 Bungo Channel slow slip event (Hirose and Obara, 2005), we did not include data from that region later than early 2003. GPS sites in the Kagoshima region were affected by an inflation event at Aira caldera throughout the GPS measurement period (Kriswati and Iguchi, 2003); we used Mogi source parameters for the inflation event estimated by Nishimura et al. (2004) to remove this effect from the dataset. We also conducted a visual inspection of the daily GPS position time series for all the sites in Kyushu and the southwest Honshu region to ensure that our velocity estimates do not include non-linear behavior that does not represent steady movement during the interseismic period.

49 We also used in our inversion other published GPS velocity fields from Heki et al.  
50 (1999), Calais et al., (2003), Sella et al. (2002), Beavan et al. (2002), and Prawirodirdjo  
51 and Bock (2004) to help place the Kyushu velocities into a regional kinematic context.

52

### 53 **Interpretation of GPS velocities using the elastic block approach**

54 To interpret the GPS velocities, we use an approach developed by McCaffrey  
55 (2002) which performs a non-linear inversion to simultaneously estimate the angular  
56 velocities of elastic blocks and coupling coefficients on block-bounding faults, to give the  
57 best fit to the GPS velocities, and optionally, earthquake slip vectors, and geological fault  
58 slip rates and azimuths. The data misfit, defined by the reduced chi-squared statistic ( $\chi_r^2$ ),  
59 is minimized. The method also allows us to optimally rotate multiple GPS velocity  
60 solutions into a common reference frame.

61 In the block models presented here, we define a Eurasian Plate, Amurian Plate,  
62 Philippine Sea Plate, and Southwest Japan Block (Fig. 3). We define most of the  
63 boundaries of the large plates (Amurian, Philippine Sea and Eurasian Plates) based on a  
64 digital compilation of tectonic plate boundaries by Bird (2003). The inclusion of these  
65 larger plates also helps us in establishing the overall plate motion budget that must occur  
66 across the plate boundary zone in southwest Japan. The Southwest Japan/Amurian Block  
67 boundary is defined by a zone of distributed faulting and historical strike-slip earthquakes  
68 near the west coast of Japan (Gutscher and Lallemand, 1999).

69 We have tested a variety of scenarios for dividing the forearc in southwest Japan  
70 into blocks. The three models we present here, are (1) where the forearc region (e.g.,  
71 Satsuma, Ohsumi and eastern Kyushu blocks) constitutes a single block, (2) where the  
72 forearc is divided into two blocks (an eastern Kyushu block, and a combined Satsuma and  
73 Ohsumi block), and (3) where the Satsuma, Ohsumi and eastern Kyushu blocks are three

74 separate forearc blocks (Fig. 3). These three models allow us to test whether or not the  
75 proposed left-lateral shear zone is required by the GPS data, and also to test for possible  
76 crustal deformation in the Kagoshima Graben region. For details of model results see  
77 discussion in main manuscript. In all models presented here, we also include a separate  
78 Shikoku block, bounded to the northwest by the Median Tectonic Line and bounded to  
79 the southeast by the Nankai Trough. The Ohsumi block is bounded to the west by the  
80 Kagoshima graben, and to the north by the left-lateral shear zone that we identify from  
81 GPS site velocities and seismicity (e.g., Kodama et al., 1995; Nishimura and Hashimoto,  
82 2006). We use the Kagoshima graben as a boundary in some of our models based on  
83 evidence from GPS (Fig. 3) and geology (Aramaki, 1984) for active extension in the  
84 Kagoshima Graben, and paleomagnetic evidence that southeast Kyushu (east of the  
85 Kagoshima graben) has rotated independently of the rest of Kyushu for the last 2-6 Myr  
86 (Kodama et al., 1995). The Satsuma block is bounded on the east by the Kagoshima  
87 graben and on the north by the hypothesized active left-lateral shear zone. The eastern  
88 Kyushu block encompasses more than half of the Kyushu forearc, whose western  
89 boundary is the Beppu-Shimabara graben.

90 To define the subduction interface fault (Nankai Trough and Ryukyu Trench), we  
91 use the configuration for the Nankai subduction interface from Shiomi et al. (2004) (Fig.  
92 3). Individual nodes on the subduction interface are defined at an average spacing of ~50  
93 km apart along strike, and at 10 km depth intervals between 0 and 50 km depth (Fig. 3).  
94 We define the Median Tectonic Line as a northward dipping fault, based on geophysical  
95 evidence (Ito et al., 1996). We approximate the Beppu-Shimabara Graben (BSG)  
96 boundary as a single fault in the model, although more complex deformation on several  
97 faults across a zone is likely to be a more realistic scenario there (Kamata and Kodama,  
98 1994). We set the BSG fault to dip northwest, in part, to deal with possible distributed

99 deformation due to faulting northwest of our prescribed boundary. McCaffrey's (2002)  
100 method is used to solve for coupling coefficients at nodes on the Nankai Trough and  
101 Ryukyu Trench, the fault representing the BSG, the Median Tectonic Line, and, in some  
102 cases, the faults representing the extensional zone in the Kagoshima Graben and a  
103 possible zone of left-lateral strike-slip cross-cutting southeast Kyushu (Fig. 3). To  
104 represent the change in coupling coefficient ( $\phi$ ) values between adjacent nodes,  $\phi$  values  
105 on 5 km x 5 km rectangular fault patches between the nodes are estimated by bilinear  
106 interpolation. Additional free parameters in the inversion are the rotation parameters  
107 (three for each block) for the tectonic blocks relative to a fixed Eurasian-plate, and  
108 rotation parameters that rotate each GPS velocity dataset into a Eurasia-fixed reference  
109 frame. Inversion results for the three models are discussed in more detail in the main  
110 manuscript.

111

112

**References cited in Appendix:**

- Altamimi, Z., P. Sillard, and C. Boucher, 2002, ITRF2000: A new release of the International Terrestrial Reference Frame for earth science applications, *J. Geophys. Res.*, 107(B10), 2214, doi:10.1029/2001JB000561.
- Aramaki, S., 1984, Formation of the Aira Caldera, southern Kyushu, 22,000 years ago, *J. Geophys. Res.*, 89(B10), 8485-8501.
- Beutler, G., H. Bock, E. Brockmann, R. Dach, P. Fridez, W. Gurtner, U. Hugentobler, D. Ineichen, J. Johnson, M. Meindl, L. Mervart, M. Rothacher, S. Schaer, T. Springer, R. Weber (2001), *Bernese GPS Software Version 4.2*, Ed. by U. Hugentobler, S. Schaer, P. Fridez, *Astronomical Institute, University of Berne*.
- Beavan, J. Tregoning, P., Bevis, M., Kato, T., and Meertens, C., 2002, Motion and rigidity of the Pacific plate and implications for plate boundary deformation: *Journal of Geophysical Research*, v. 107, p. 2261-2276.
- Bird, P., 2003, An updated digital model of plate boundaries, *Geochem. Geophys. Geosyst.*, 4(3), 1027, doi:10.1029/2001GC000252.
- Calais E., Vergnolle, M., San'kov, V., Likhnev, A., Miroshnitchenko, A., Amarjargal, S., Déverchère, J., 2003, GPS measurements of crustal deformation in the Baikal-Mongolia area (1994–2002): Implications for current kinematics of Asia, *Journal of Geophysical Research*, v. 108, B102501.
- Fujiwara, S., H. Yari, S. Ozawa, M. Tobita, M. Murakami, H. Nakagawa, and K. Nitta, 1998, Surface displacement of the March 26, 1997, Kagoshima-ken-hokuseibu earthquake in Japan from synthetic aperture radar interferometry, *Geophys. Res. Lett.*, 25(24), 4541-4544.
- Gutscher, M.-A., and S. Lallemand, 1999, Birth of a major strike-slip fault in SW Japan, *Terra Nova*, 11(5), 203-209.

138 Heki, K., S. Miyazaki, H. Takahashi, M. Kasahara, F. Kimata, S. Miura, N. Vasilenko, A.  
 139 Ivashehenko, and K.-D. An, 1999, The Amurian plate motion and current plate  
 140 kinematics in Eastern Asia, *Journal of Geophysical Research*, v. 104, p. 29147-  
 141 29155.

142 Herring, T. A., 2001, GLOBK global Kalman filter VLBI and GPSanalysis program,  
 143 version 5.03, Massachusetts Institute of Technology, Cambridge.

144 Hirose, H., K. Hirahara, F. Kimata, N. Fujii, and S. Miyazaki, 1999, A slow thrust slip  
 145 event following the two 1996 Hyuganada earthquakes beneath the Bungo Channel,  
 146 southwest Japan, *Geophys. Res. Lett.*, 26(21), 3237-3240.

147 Hirose, H., and K. Obara, 2005, Repeating short- and long-term slow slip events with  
 148 deep tremor activity around the Bungo Channel region, southwest Japan, *Earth*,  
 149 *Planets and Space*, v. 57, p. 961-972.

150 Ito, T., T. Ikawa, S. Yamakita, and T. Maeda, Gently north-dipping Median Tectonic Line  
 151 (MTL) revealed by recent seismic reflection studies, southwest Japan, *Tectonophys.*,  
 152 264, 51–63, 1996.

153 Kamata, H., and Kodama, K., 1994, Tectonics of an arc-arc junction: an example from  
 154 Kyushu Island at the junction of the Southwest Japan Arc and the Ryukyu Arc:  
 155 *Tectonophysics*, v. 233, p. 69–81, doi: 10.1016/0040-1951(94)90220-8.

156 Kodama, K., Tashiro, H., and Takeuchi, T., 1995, Quaternary counterclockwise rotation  
 157 of south Kyushu, southwest Japan: *Geology*, v. 23, p. 823–826, doi: 10.1130/0091-  
 158 7613(1995)023<0823:QCROSK>2.3.CO;2.

159 Kriswati, E. and Iguchi, M., 2003, Inflation of the Aira Caldera prior to the 1999 eruptive  
 160 activity at Sakurajima Volcano detected by GPS network in south Kyushu, *Disaster*  
 161 *Prevention Research Institute Report*, 46, 817-825.

162 Langbein J., 2004, Noise in two-color electronic distance meter measurements revisited,  
 163 *J. Geophys. Res.*, *109*, B04406, doi:10.1029/2003JB002819.

164 McCaffrey, R., 2002, Crustal block rotations and plate coupling, in Stein, S., and  
 165 Freymueller, J., eds., Plate boundary zones: American Geophysical Union  
 166 Geodynamics Series 30, p. 100–122.

167 Miyazaki, S., Y. Hatanaka, T. Sagiya, and T. Tada, 1998, The nationwide GPS array as an  
 168 Earth Observation System, Bulletin of the Geographical Survey Institute, v. 44, p. 11-  
 169 22.

170 Nishimura, S., Hashimoto, M., and Ando, M., 2004, A rigid block rotation model for the  
 171 GPS derived velocity field along the Ryukyu arc, Physics of the Earth and Planetary  
 172 Interiors, v. 142, p. 185-203.

173 Nishimura, S. and M. Hashimoto, 2006, A model with rigid rotations and slip deficits for  
 174 the GPS-derived velocity field in Southwest Japan, *Tectonophysics*, *421*, 187-207.

175 Prawirodirdjo, L. and Y. Bock (2004): Instantaneous global plate motion model from 12  
 176 years of continuous GPS observations, Journal of Geophysical Research., v. 109,  
 177 B08405.

178 Rothacher, M., and L. Mervart (eds.), Documentation of the Bernese GPS Software  
 179 Version 4.0, 418 pp, Astron. Inst., Univ. of Bern, Bern, Switzerland, 1996.

180 Sagiya, T., S. Miyazaki, and T. Tada (2000), Continuous GPS array and present-day  
 181 crustal deformation of Japan, *Pure and Applied Geophysics*, 2303-2322.

182 Sella, G.F., Dixon, T.H., and Mao, A.L., 2002, REVEL: A model for recent plate  
 183 velocities from space geodesy, Journal of Geophysical Research, v. 107, 2081-2112.

184 Shiomi, K., Sato, H., Obara, K., and Ohtake, M., 2004, Configuration of the subducting  
 185 Philippine Sea plate beneath southwest Japan revealed from receiver function



186 analysis based on multivariate autoregressive model: Journal of Geophysical  
187 Research, v. 109, p. B04308, doi: 10.1029/2003JB002774.

188 Williams S. D. P., Y. Bock, P. Fang, P. Jamason, R. M. Nikolaidis, L. Prawirodirdjo, M.  
189 Miller, D. J. Johnson (2004), Error analysis of continuous GPS position time series, *J.*  
190 *Geophys. Res.*, 109, B03412, doi:10.1029/2003JB002741.

191 Yagi, Y., M. Kikuchi, and T. Sagiya, 2001, co-seismic slip, post-seismic slip, and  
192 aftershocks associated with two large earthquakes in 1996 in Hyuga-nada, Japan,  
193 *Earth Planets Space*, 53, 793-803.

194 Zhang, J., Y. Bock, H. Johnson, P. Fang, S. Williams, J. Genrich, S. Wdowinski, and J.  
195 Behr (1997), Southern California Permanent GPS Geodetic Array: Error analysis of  
196 daily position estimates and site velocities, *J. Geophys. Res.*, 102(B8), 18,035–18,056.

197
